# Supplementary material for: A method for the quantitative determination of glycerophospholipid regioisomers by UPLC-ESI-MS/MS
Source: PubMed Central journal article supplement (PMC6338697; doi:10.1007/s00216-018-1517-5), 2018-12-22
Supplement: 216_2018_1517_MOESM1_ESM.pdf [file 216_2018_1517_MOESM1_ESM.pdf]

**Analytical and Bioanalytical Chemistry**

**Electronic Supplementary Material**

**A method for the quantitative determination of glycerophospholipid regioisomers by UPLC-ESI-MS/MS**

Katharina Wozny, Wolf D. Lehmann, Manfred Wozny, Berna Sariyar Akbulut, Britta Brügger

Additional files available under [10.1007/s00216-018-1517-5](https://doi.org/10.1007/s00216-018-1517-5)
